# Supplementary material for: High performance NMR in ionic liquids
Source: Royal Society of Chemistry journal article supplement (doi:10.1039/b417783e), 2005-01-01
Supplement: b417783e.pdf [file b417783e.pdf]

## Supporting information

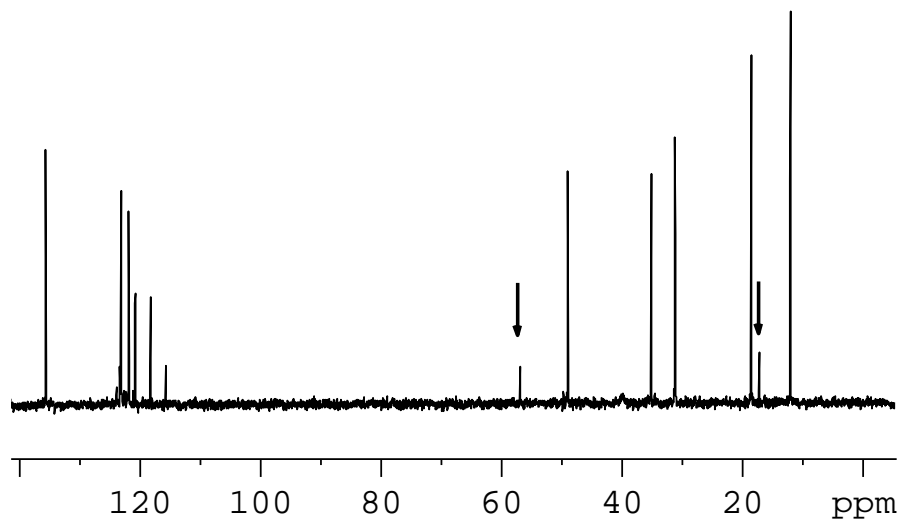

Figure 1:  $^{13}\text{C}$  spectrum of  $[\text{BMIM}][\text{Tf}_2\text{N}]$  containing a drop of ethanol. The spectrum has been acquired with  $^2\text{H}$  lock on a 5 mm BBI probe. Marked signals are attributed to ethanol.

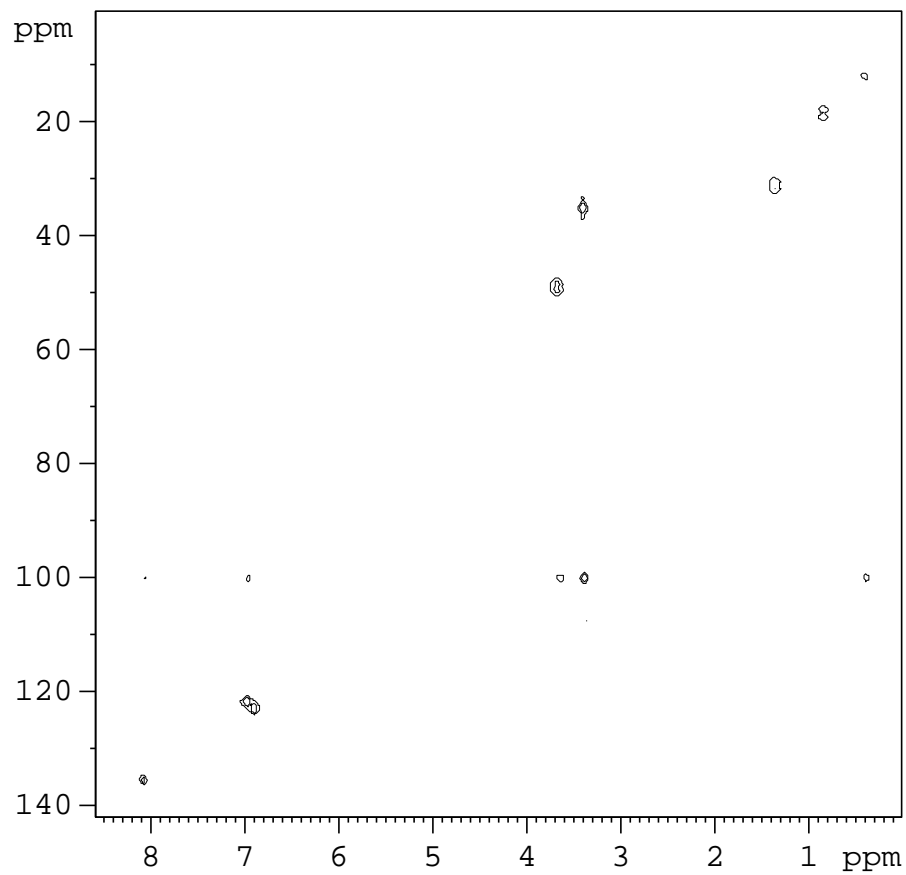

Figure 2: Gradient-selected HMQC spectrum of [BMIM][Tf<sub>2</sub>N]. The spectrum has been acquired  $^2\text{H}$  lock on a 5 mm BBI probe.

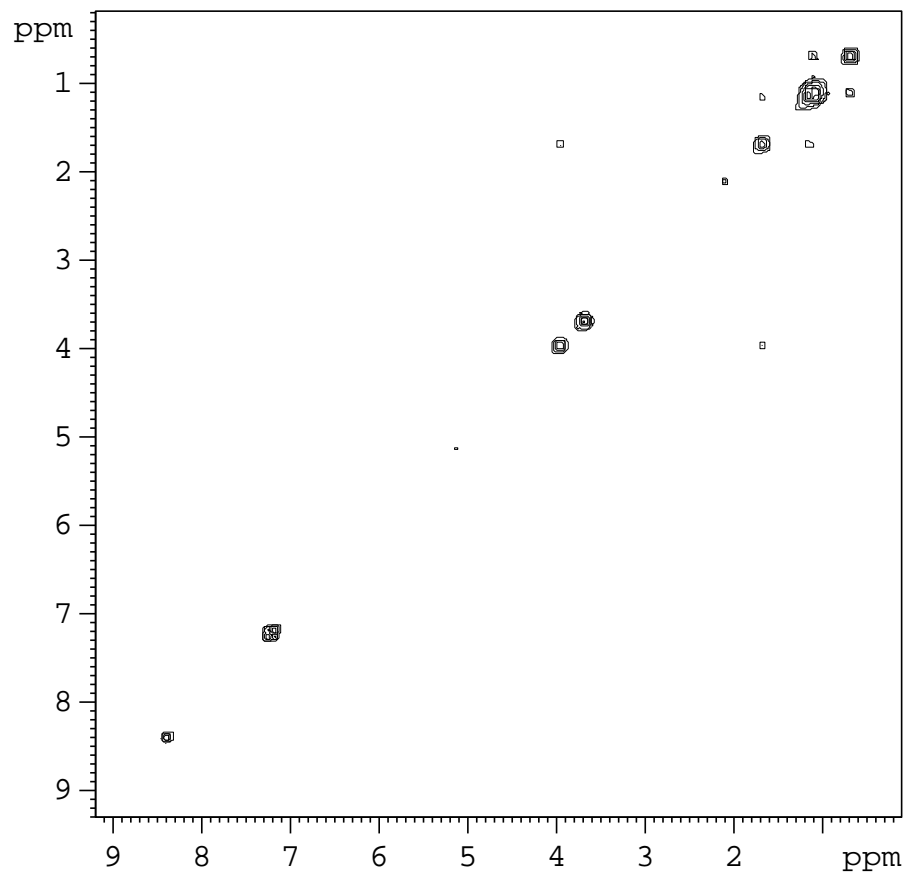

Figure 3: Gradient-selected COSY spectrum of [C<sub>10</sub>MIM][Tf<sub>2</sub>N]. The spectrum has been acquired with <sup>19</sup>F lock on a 10 mm TXO probe.
